# Supplementary material
Source: PubMed Central journal article supplement (PMC9295544)
Supplement: jb.00182-22-s0001.pdf [file jb.00182-22-s0001.pdf]

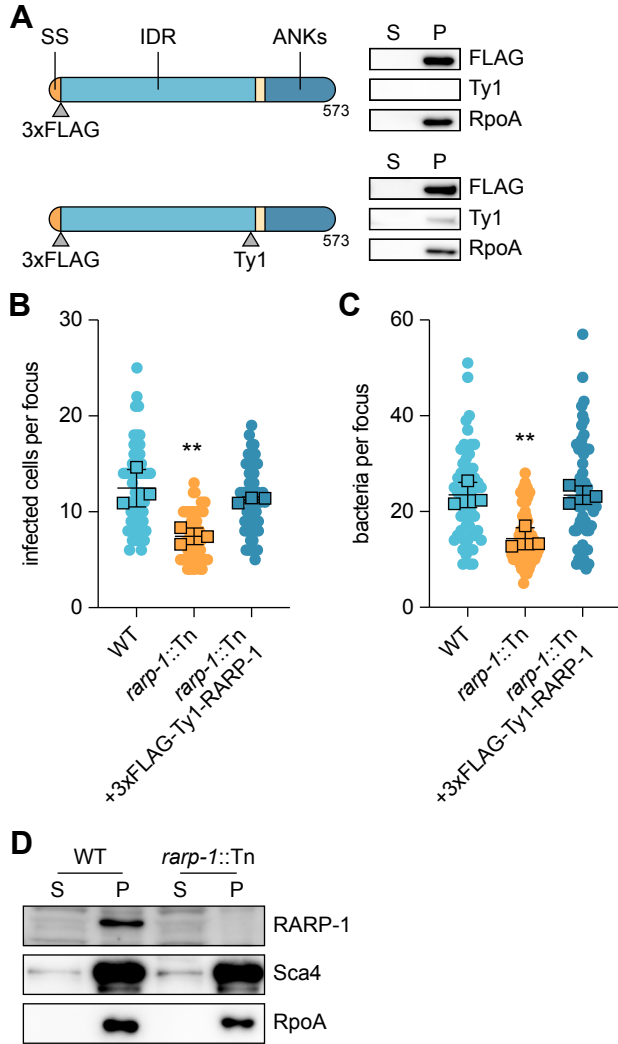

**Supplementary Figure 1. Tagged RARP-1 constructs and endogenous RARP-1 are not secreted.** (A) *R. parkeri* RARP-1 with insertion sites for 3xFLAG and Ty1 epitope tags indicated (arrowheads). Western blots for FLAG (top) and Ty1 (middle) after infection of A549 cells with *rarp-1::Tn* + 3xFLAG-RARP-1 (single-tagged) or *rarp-1::Tn* + 3xFLAG-Ty1-RARP-1 (dual-tagged) bacteria. (B) Infected cells per focus during infection of A549 cells. (C) Bacteria per focus during infection of A549 cells. In (B) and (C), the means from three independent experiments (squares) are superimposed over the raw data (circles) and were used to calculate the mean  $\pm$  SD and p-value (one-way ANOVA with post-hoc Dunnett's test, \*\* $p < 0.01$  relative to WT). (D) Western blots for RARP-1 (top) and Sca4 (middle) after infection of A549 cells with WT or *rarp-1::Tn* bacteria. Note the specific RARP-1 band in the pellet sample for WT bacteria only, in contrast to the identical non-specific bands in the supernatant samples for WT and *rarp-1::Tn* bacteria. In (A) and (D), infected host cells were selectively lysed after 48 h to separate supernatants (S) containing the infected host cytoplasm from pellets (P) containing intact bacteria. RpoA (bottom) served as a control for bacterial lysis or contamination of the infected cytoplasmic fraction.

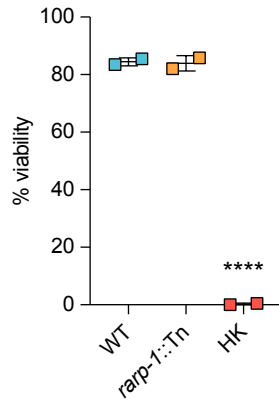

**Supplementary Figure 2. RARP-1 is dispensable for bacterial viability.**

Bacteria were released from infected A549 cells after 48 h and viability was assessed by differential staining. Percentages were determined from two independent experiments ( $\geq 160$  bacteria were counted for each infection) and were used to calculate the mean  $\pm$  SD and p-value (one-way ANOVA with post-hoc Dunnett's test, \*\*\*\* $p < 0.0001$  relative to WT). Heat-killed (HK) bacteria served as a positive control.

**A**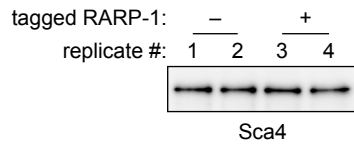**B**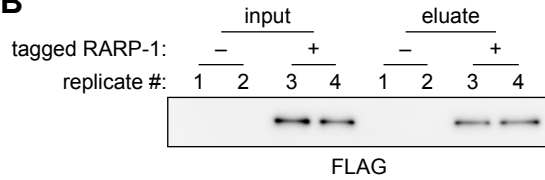

**Supplementary Figure 3. Inputs and eluates from co-immunoprecipitation of lysozyme-permeabilized bacteria.** (A) Western blot for Sca4 (loading control) in input lysates. (B) Western blot for FLAG in input lysates and FLAG immunoprecipitation eluates. In (A) and (B), bacteria expressing tagged (+) or untagged (-) RARP-1 were purified and then permeabilized by lysozyme prior to immunoprecipitation. Two replicate samples were harvested from each strain.

**Supplementary Table 1. Strains and plasmids used in this study.**

| Strain or plasmid                      | Genotype or feature                                       | Reference or source       |
|----------------------------------------|-----------------------------------------------------------|---------------------------|
| <b><i>R. parkeri</i> strains</b>       |                                                           |                           |
| <i>R. parkeri</i> str. Portsmouth      | Parental <i>R. parkeri</i> strain                         | Chris Paddock             |
| WT                                     | pRAM18dSGA+OmpApr-GFPuv                                   | (1)                       |
| <i>rarp-1</i> ::Tn                     | <i>rarp-1</i> ::Tn                                        | (2)                       |
| <i>sca2</i> ::Tn                       | <i>sca2</i> ::Tn +<br>pRAM18dSGA+OmpApr-GFPuv             | (2)                       |
| <i>ompB</i> <sup>STOP</sup> ::Tn       | <i>ompB</i> <sup>STOP</sup> ::Tn                          | (3)                       |
| <i>rarp-1</i> ::Tn + 3xFLAG-RARP-1     | <i>rarp-1</i> ::Tn + pRAM18dSGA-<br>3xFLAG-RARP-1         | This study                |
| <i>rarp-1</i> ::Tn + 3xFLAG-Ty1-RARP-1 | <i>rarp-1</i> ::Tn + pRL0079                              | This study                |
| GSK-BFP                                | pRL0284                                                   | This study                |
| GSK-RARP-2                             | pRL0285                                                   | This study                |
| GSK-RARP-1                             | pRL0286                                                   | This study                |
| <b><i>E. coli</i> strains</b>          |                                                           |                           |
| WT                                     | Keio Knockout Collection parental<br>K12 strain (BW25113) | (4); Horizon<br>Discovery |
| $\Delta tolC$                          | $\Delta tolC$ ::Kan (JW5503-1)                            | (4); Horizon<br>Discovery |

|                                             |                         |            |
|---------------------------------------------|-------------------------|------------|
| WT + 3xFLAG-RARP-1 <sub>Rp</sub>            | WT + pRL0287            | This study |
| WT + 3xFLAG-RARP-1 <sub>Rt</sub>            | WT + pRL0288            | This study |
| $\Delta toIC$ + 3xFLAG-RARP-1 <sub>Rp</sub> | $\Delta toIC$ + pRL0287 | This study |
| $\Delta toIC$ + 3xFLAG-RARP-1 <sub>Rt</sub> | $\Delta toIC$ + pRL0288 | This study |
| WT + Myc-6xHis-RARP-1 <sub>Rt</sub>         | WT + pRL0290            | This study |
| WT + 6xHis-YebF                             | WT + pRL0291            | This study |

---

### Plasmids

|                          |                                                 |                  |
|--------------------------|-------------------------------------------------|------------------|
| pRAM18dSGA[MCS]          | <i>Rickettsia</i> shuttle vector                | Ulrike Munderloh |
| pRAM18dSGA+OmpApr-GFPuv  | GFPuv                                           | (1)              |
| pRAM18dSGA-3xFLAG-RARP-1 | 3xFLAG-tagged <i>R. parkeri</i> RARP-1          | This study       |
| pRL0079                  | 3xFLAG- and Ty1-tagged <i>R. parkeri</i> RARP-1 | This study       |
| pRL0284                  | GSK-tagged TagBFP                               | This study       |
| pRL0285                  | GSK-tagged <i>R. parkeri</i> RARP-2             | This study       |
| pRL0286                  | GSK-tagged <i>R. parkeri</i> RARP-1             | This study       |
| pEXT20                   | IPTG-inducible <i>E. coli</i> expression vector | This study       |
| pRL0287                  | 3xFLAG-tagged <i>R. parkeri</i> RARP-1          | This study       |
| pRL0288                  | 3xFLAG-tagged <i>R. typhi</i> RARP-1            | This study       |
| pRL0290                  | Myc-6xHis-tagged <i>R. typhi</i> RARP-1         | This study       |
| pRL0291                  | 6xHis-tagged <i>E. coli</i> YebF                | This study       |

---

## References

1. Lamason RL, Bastounis E, Kafai NM, Serrano R, del Álamo JC, Theriot JA, Welch MD. 2016. *Rickettsia* Sca4 reduces vinculin-mediated intercellular tension to promote spread. *Cell* 167:670-683.e10.
2. Lamason RL, Kafai NM, Welch MD. 2018. A streamlined method for transposon mutagenesis of *Rickettsia parkeri* yields numerous mutations that impact infection. *PLOS ONE* 13:e0197012.
3. Engström P, Burke TP, Mitchell G, Ingabire N, Mark KG, Golovkine G, Iavarone AT, Rape M, Cox JS, Welch MD. 2019. Evasion of autophagy mediated by *Rickettsia* surface protein OmpB is critical for virulence. *Nat Microbiol* 4:2538–2551.
4. Baba T, Ara T, Hasegawa M, Takai Y, Okumura Y, Baba M, Datsenko KA, Tomita M, Wanner BL, Mori H. 2006. Construction of *Escherichia coli* K-12 in-frame, single-gene knockout mutants: the Keio collection. *Mol Syst Biol* 2:2006.0008.
